# Supplementary material
Source: bioRxiv or medRxiv preprint supplement (https://www.biorxiv.org/highwire/filestream/24286/field_highwire_adjunct_files/0/028324-1.pdf)
Supplement: Supplementary file [file 028324-1.pdf]

# Table of Contents

|    |                                                      |             |
|----|------------------------------------------------------|-------------|
| 13 |                                                      |             |
| 14 |                                                      |             |
| 15 |                                                      |             |
| 16 | COX2 nucleotide statistics                           | <u>2</u>    |
| 17 |                                                      |             |
| 18 | Maximum-Likelihood phylogenetic tree of COX2 3'end   |             |
| 19 | region is incongruent with the species tree due to a |             |
| 20 | recombination hotspot                                | <u>2-3</u>  |
| 21 |                                                      |             |
| 22 | ORF1 gene structure                                  | <u>3-5</u>  |
| 23 |                                                      |             |
| 24 | ORF1 detection of selection                          | <u>5-6</u>  |
| 25 |                                                      |             |
| 26 | References                                           | <u>6-8</u>  |
| 27 |                                                      |             |
| 28 | Supplementary Tables and Figures                     | <u>8-35</u> |
| 29 |                                                      |             |
| 30 |                                                      |             |
| 31 |                                                      |             |

## 32 **Supplementary Text**

### 33 **COX2 nucleotide statistics**

34 A total of five hundred and seventeen COX2 sequences of worldwide distributed wild  
35 *Saccharomyces* strains and forty-nine sequences of domesticated natural hybrids were  
36 sequenced or retrieved from public databases (Table S1, Figure 1). The COX2 alignment  
37 is 585 bp, with 106 variable positions (18.11%) (Figure S2) where 43.4% of  
38 polymorphisms are found in the last 89 nucleotides. 80 of the variable positions are  
39 phylogenetically informative. 27 variable sites correspond to 0-fold degenerated, but only  
40 10 of them are informative. 20 variable sites correspond to 2-fold degenerated positions  
41 (19 informative and 1 singleton), being 5 of them non-synonymous substitutions. Finally,  
42 42 variable sites are 4-fold degenerated and 38 of them are informative.

43 COX2 genetic diversity statistics are summarized in Table S3. The most diverse  
44 sequences were found in three species, *S. cerevisiae*, *S. paradoxus* and *S. mikatae*. In  
45 the case of *S. cerevisiae* nucleotide diversity values of 2.1% are so much higher than  
46 values inferred for the nuclear genome, around 0.9% (Liti *et al.* 2009), suggesting that  
47 recombination is increasing the values. For *S. eubayanus* and *S. uvarum*, the COX2  
48 nucleotide diversity values, 0.5 and 0.6% respectively, are lower than those found for the  
49 nuclear genome, around 0.8% (Patagonia A-Patagonia B *S. eubayanus*) and 1%  
50 (Holarctic-South America B *S. uvarum*) (Almeida *et al.* 2014; Peris *et al.* 2014) in  
51 agreement with the low mutation rate of yeast mitochondrial genomes (Clark-Walker  
52 1991). COX2 values for *S. kudriavzevii* strains are similar to those inferred for the nuclear  
53 genome, 1.11% (Hittinger *et al.* 2010).

54

### 55 **Maximum-Likelihood phylogenetic tree of COX2 3'end region is incongruent with** 56 **the species tree due to a recombination hotspot**

57 COX2 alignment was split in two segments based on the most common recombination  
58 point. We reconstructed the Maximum-Likelihood tree with PhyML v3.0 (Guindon and  
59 Gascuel 2003) using the best fitted substitution model inferred by jModeltest (Posada  
60 2008). Phylogenetic trees comparison with the *Saccharomyces* species tree was  
61 performed in Tree Puzzle v5.2 (Schmidt *et al.* 2002) implemented with the  
62 conservative Shimodaira-Hasegawa (Shimodaira and Hasegawa 1999) and Expected

63 Likelihood weights (ELW) (Strimmer and Rambaut 2002) tests. Both COX2 5'end  
64 segment and the species tree agree each other; however, the COX2 3'end was best  
65 explained by the inferred ML using that sequence region, and significantly rejected the  
66 topology of the species tree ( $p$ -value  $< 1 \cdot 10^{-5}$ ), suggesting incongruence between the  
67 inferred ML COX2 3'end phylogenetic tree and the species tree.

68 A set of COX2 representative sequences of each haplotype was the input of  
69 RDPv3.44 package (Martin *et al.* 2010). RDP includes six methods to detect  
70 recombination: RDP (Martin and Rybicki 2000), Bootscanning (Salminen *et al.* 1995),  
71 MaxChi (Smith 1992), Chimaera (Smith 1992), GeneConv (Padidam *et al.* 1999) and Sis-  
72 scan (Gibbs *et al.* 2000). Default settings were set up with a statistical significance  
73 threshold of  $p$ -value  $< 0.05$ , with Bonferroni correction for multiple comparisons.

74 Codons (nucleotide sequences 526-528 and 535-537) in the COX2 3' end show  
75 several convergent nucleotide substitutions among *S. cerevisiae* and *S. paradoxus*  
76 strains. This finding might be the result of a “patchy-tachy” effect due to different  
77 substitution rate in those positions (Sun *et al.* 2011). Homoplasies can drive to  
78 recombinant false positives. One confounding effect can be observed in L1528 and  
79 CECT11757 strains which is difficult to know if they were truly introgressed or they  
80 suffered two different recombination events with two different *S. paradoxus* lineages, Far  
81 Eastern and European. A recent study shown transfers from European *S. paradoxus*  
82 GC42 cluster to *S. cerevisiae* L1528 (Wu and Hao 2015). Also the presence of type II  
83 ORF1 segments supports the introgression scenario and a double recombination  
84 scenario.

85

### 86 **ORF1 gene structure**

87 52 different haplotypes were found in our representative strains (Table S1). ORF1  
88 start codon is nineteen nucleotides inside the 3' end of COX2 gene. The average GC-  
89 composition of the ORF1 is extremely low, 18%. Eleven strains have a GTG as a start  
90 codon, which is uncommon in yeast mitochondria: haplotypes M2-M7 and M9-M12. The  
91 translation of the ORF1 gene predicts fourteen strains having a premature stop codon:  
92 haplotypes M2, M3, M7-M11, M17-M20, M23 and M46. ORF1 sequence length range  
93 from 1363bp (*S. cerevisiae* ZA17 strain) to 1516bp (*S. cerevisiae* VRB strain), translated

94 to 454 and 505, respectively. Note that we sequenced a partial *ORF1* gene, and the last  
95 45 nucleotides were not sequenced in this study.

96 *ORF1* secondary structure and domains (LAGLIDADG and NUMOD) were annotated  
97 in Jalview according to Dalgaard *et al.* (Dalgaard *et al.* 1997) and using the Conserved  
98 Domains tool in NCBI (<http://www.ncbi.nlm.nih.gov/Structure/cdd/wrpsb.cgi>) (Marchler-  
99 Bauer *et al.* 2009). WebLogo profiles of LAGLIDADG and NUMOD1 domains were done  
100 in WebLogo 2.8.2 tool (<http://weblogo.berkeley.edu/>). Three different domains were  
101 found in all *ORF1* sequences: two LADGLIDADG (P1 and P2) and one NUMOD1 (Figure  
102 6, S9 and S10). Two non-*Saccharomyces ORF1* were detected by PSI-BLAST (Altschul  
103 *et al.* 1997) showing some similarities with the *Saccharomyces ORF1* sequences. We  
104 generated a new alignment in Jalview 4.0.b2 (Waterhouse *et al.* 2009) including the  
105 *Cyberlindnera (Williopsis) saturnus* var. *suaveolans* (*ORF1* and *ORF3*), and one from  
106 *Kazachstania servazii* (SasefMp08) sequences (Figure S10). The sequence from *K.*  
107 *servazii* was found to be closely related to the *Saccharomyces ORF1* sequences (Figure  
108 S3). Although, *C. saturnus* is phylogenetically fairly distant from *Saccharomyces* genus  
109 (James SA *et al.* 1998), they have been diverging since 235mya, we observed some  
110 conservation among LAGLIDADG and NUMOD aminoacids when compared with  
111 *Saccharomyces* and non-*Saccharomyces ORF1* sequences (Figure S9 and S10).

112 Differences in size among *ORF1* gene sequences were due to the presence of GC  
113 insertions (Figure S3) and AT repeats (Table S4). Seven different GC clusters insertion  
114 points were found along the *ORF1* alignment. GC cluster 1 is observed in *S. cerevisiae*  
115 VRB; three types of GC cluster 2 were found in *S. cerevisiae* CBS435, CECT11757, and  
116 *S. paradoxus* 120MX (Figure S3 and S11); GC cluster 3 is shown in *S. arboricola*  
117 CBS10644; GC cluster 4 is shown in *S. cerevisiae* VRB; GC cluster 5 is inserted in *ORF1*  
118 of *S. cerevisiae* CBS435, and was structurally similar to GC cluster 3 of *S. arboricola*  
119 CBS10644; GC cluster 6 and 7 were the most frequent among *Saccharomyces* strains  
120 (Figure S3 and S12). 40 *S. cerevisiae* and one hybrid *S. cerevisiae* x *S. kudriavzevii*  
121 (AMH) have the GC cluster 6, and 36 *S. cerevisiae*, 2 hybrids *S. cerevisiae* x *S.*  
122 *kudriavzevii*, 2 Far Eastern and 2 American *S. paradoxus* shown the GC cluster 7 in their  
123 *ORF1* sequences (Figure S3 and S11). Some GC clusters sequences were found  
124 inverted (Figure S3 and S11). GC cluster 7 of the two American *S. paradoxus* (120MX

125 and CBS5313) and three *S. cerevisiae*, two from Japan and one from USA (CBS435, Y9  
126 and YPS606), contained identical GC cluster sequence (Figure S12). The confirmation of  
127 the American *S. paradoxus* mitochondrial background will shed light about the origin of  
128 this GC cluster, which simplest scenario is a transfer from the *S. cerevisiae* mitochondrial  
129 genome to *S. paradoxus ORF1*.

130 *ORF1* GC clusters were classified according to Zamaroczy and Bernardi (de  
131 Zamaroczy and Bernardi 1986), except for GC cluster 2. GC cluster 1 and 4 are similar  
132 to a1 family, and GC cluster 3 and 5 were similar to a4 family. In the case of GC cluster  
133 1, 2, 4, and 5 are on the opposite strand. As Séraphin *et al.* (1987) and Weiller *et al.*  
134 (1989) described, the GC clusters of the *ORF1* gene were flanked by TAG and AGGAG,  
135 or CTA and CTCCT when the cluster was inserted in the opposite strand (Figure S11).  
136 These conserved nucleotides were flanked by A+T rich sequences. Flanking sequences  
137 TAG and AG (CTA and CT) are conserved in most of the sequences with and without GC  
138 clusters. All GC clusters in *ORF1* belong to group M1 (Weiller *et al.* 1989). Conserved  
139 flanking regions might help to the transposition of GC clusters.

140 Differences in size were also due to the presence of AT repeats. Tandem repeat  
141 sequences for *COX2* and *ORF1* genes were detected and described using `Tandem`  
142 `Repeat Finder` software (Benson 1999). Twenty-one different A+T rich sequences that  
143 repeated at least twice were found in the *ORF1* alignment (Table S4). The length of A+T  
144 rich tandem repeats ranged from three nucleotides to twenty-five nucleotides. The most  
145 repeated sequence (AAT) was repeated ten times in haplotypes M1, M12, M22, M39,  
146 M40, and M50. The A+T rich tandem repeats were located near to GC clusters (Figure  
147 6). In the *COX2* gene, we found three A+T rich sequences repeated twice (Table S4).

148

### 149 ***ORF1* detection of selection**

150 The single likelihood ancestor counting (SLAC), fixed effects likelihood (FEL), and  
151 random effects likelihood (REL) methods (Pond and Frost 2005), implemented in the  
152 `HYPHY` web based version, `Datamonkey` (Delport *et al.* 2010), were used to detect the  
153 signatures of selection operating on the *ORF1* gene. NJ phylogenetic trees were  
154 reconstructed under the REV (GTR) substitution model. Two different approaches were  
155 performed to describe selection signatures. In the first approach, a complete *ORF1*

156 alignment, without GC Insertions and indels, partitioned by recombinant sections detected  
157 by GARD, was used. In a second study, the two LADGLIDADG and the NUMOD domains  
158 were analyzed independently.

159 Aminoacid positions were described as being under positive or purifying selection  
160 when significant values were generated by two of the three tested methods. Codon-  
161 specific selection pressure along the sequences (i.e. site specific dN-dS) was measured  
162 and *p*-values were estimated at each site. We analyzed 417 *ORF1* codons of the total  
163 458. 61 codons, corresponding to 15% of the total, were found to be under purifying  
164 selection, where 43 of the 61 codons were found in LAGLIDADGs and NUMOD1 domains  
165 (Figure S9). A functional characterization might help to understand how important these  
166 aminoacids are for the activity of this homing endonuclease.

167

## 168 **References**

169 Almeida P, Gonçalves C, Teixeira S *et al.* 2014. A Gondwanan imprint on global diversity  
170 and domestication of wine and cider yeast *Saccharomyces uvarum*. *Nat Commun.* 5.

171 Altschul SF, Madden TL, Schaffer AA, Zhang J, Zhang Z, Miller W, Lipman DJ. 1997.  
172 Gapped BLAST and PSI-BLAST: a new generation of protein database search programs.  
173 *Nucl Acids Res.* 25:3389-3402.

174 Benson G. 1999. Tandem repeats finder: a program to analyze DNA sequences. *Nucl*  
175 *Acids Res.* 27:573-580.

176 Clark-Walker GD. 1991. Contrasting mutation rates in mitochondrial and nuclear genes  
177 of yeasts versus mammals. *Curr Genet.* 20:195-198.

178 Dalgaard JZ, Klar AJ, Moser MJ, Holley WR, Chatterjee A, Mian IS. 1997. Statistical  
179 modeling and analysis of the LAGLIDADG family of site- specific endonucleases and  
180 identification of an intein that encodes a site-specific endonuclease of the HNH family.  
181 *Nucl Acids Res.* 25:4626-4638.

182 de Zamaroczy M, Bernardi G. 1986. The GC clusters of the mitochondrial genome of  
183 yeast and their evolutionary origin. *Gene.* 41:1-22.

184 Delpont W, Poon AFY, Frost SDW, Kosakovsky Pond SL. 2010. Datamonkey 2010: a  
185 suite of phylogenetic analysis tools for evolutionary biology. *Bioinformatics.* 26:2455-  
186 2457.

187 Gibbs MJ, Armstrong JS, Gibbs AJ. 2000. Sister-Scanning: a Monte Carlo procedure for  
188 assessing signals in recombinant sequences. *Bioinformatics*. 16:573-582.

189 Guindon S, Gascuel O. 2003. A simple, fast, and accurate algorithm to estimate large  
190 phylogenies by Maximum Likelihood. *Syst Biol*. 52:696-704.

191 Hittinger CT, Gonçalves P, Sampaio JP, Dover J, Johnston M, Rokas A. 2010.  
192 Remarkably ancient balanced polymorphisms in a multi-locus gene network. *Nature*.  
193 464:54-58.

194 James SA, Roberts IN, Collins MD. 1998. Phylogenetic heterogeneity of the genus  
195 *Williopsis* as revealed by 18S rRNA gene sequences. *Int J Syst Bacteriol*. 48:591-596.

196 Leducq JB, Charron G, Samani P *et al*. 2014. Local climatic adaptation in a widespread  
197 microorganism. *Proc R Soc Lond B Biol Sci*. 281:

198 Liti G, Carter DM, Moses AM *et al*. 2009. Population genomics of domestic and wild  
199 yeasts. *Nature*. 458:337-341.

200 Livingstone C, Barton GJ. 1993. Protein sequence alignments: a strategy for the  
201 hierarchical analysis of residue conservation. *Comput Appl Biosci*. 9:745-756.

202 Marchler-Bauer A, Anderson JB, Chitsaz F *et al*. 2009. CDD: specific functional  
203 annotation with the Conserved Domain Database. *Nucleic Acids Res*. 37:D205-D210.

204 Martin D, Rybicki E. 2000. RDP: detection of recombination amongst aligned sequences.  
205 *Bioinformatics*. 16:562-563.

206 Martin DP, Lemey P, Lott M, Moulton V, Posada D, Lefevre P. 2010. RDP3: a flexible  
207 and fast computer program for analyzing recombination. *Bioinformatics*. 26:2462-2463.

208 Padidam M, Sawyer S, Fauquet CM. 1999. Possible emergence of new Geminiviruses  
209 by frequent recombination. *Virology*. 265:218-225.

210 Peris D, Sylvester K, Libkind D, Gonçalves P, Sampaio JP, Alexander WG, Hittinger CT.  
211 2014. Population structure and reticulate evolution of *Saccharomyces eubayanus* and its  
212 lager-brewing hybrids. *Mol Ecol*. 23:2031-2045.

213 Pond SLK, Frost SDW. 2005. Datamonkey: rapid detection of selective pressure on  
214 individual sites of codon alignments. *Bioinformatics*. 21:2531-2533.

215 Posada D. 2008. jModelTest: phylogenetic model averaging. *Mol Biol Evol*. 25:1253-  
216 1256.



217 Salminen MO, Carr JK, Burke DS, McCutchan FE, Garcia-Martinez J. 1995. Identification  
218 of breakpoints in intergenotypic recombinants of HIV type 1 by bootscanning. *AIDS Res*  
219 *Hum Retroviruses*. 11:1423-1425.

220 Schmidt HA, Strimmer K, Vingron M, von Haeseler A. 2002. TREE-PUZZLE: maximum  
221 likelihood phylogenetic analysis using quartets and parallel computing. *Bioinformatics*.  
222 18:502-504.

223 Séraphin B, Simon M, Faye G. 1987. The mitochondrial reading frame RF3 is a functional  
224 gene in *Saccharomyces uvarum*. *J Biol Chem*. 262:10146-10153.

225 Shimodaira H, Hasegawa M. 1999. Multiple comparisons of log-likelihoods with  
226 applications to phylogenetic inference. *Mol Biol Evol*. 16:1114-1116.

227 Smith JM. 1992. Analyzing the mosaic structure of genes. *J Mol Evol*. 34:126-129.

228 Strimmer K, Rambaut A. 2002. Inferring confidence sets of possibly misspecified gene  
229 trees. *Proceedings Biological sciences / The Royal Society*. 269:137-142.

230 Sun S, Evans BJ, Golding GB. 2011. "Patchy-Tachy" leads to false positives for  
231 recombination. *Mol Biol Evol*. 28:2549-2559.

232 Wang QM, Liu WQ, Liti G, Wang SA, Bai FY. 2012. Surprisingly diverged populations of  
233 *Saccharomyces cerevisiae* in natural environments remote from human activity. *Mol Ecol*.  
234 21:5404-5417.

235 Waterhouse AM, Procter JB, Martin DMA, Clamp M, Barton GJ. 2009. Jalview Version 2-  
236 -a multiple sequence alignment editor and analysis workbench. *Bioinformatics*. 25:1189-  
237 1191.

238 Weiller G, Schueller CME, Schweyen RJ. 1989. Putative target sites for mobile G+C rich  
239 clusters in yeast mitochondrial DNA: Single elements and tandem arrays. *Mol Gen Genet*.  
240 218:272-283.

241 Wu B, Hao W. 2015. A dynamic mobile DNA family in the yeast mitochondrial genome.  
242 *G3: Genes|Genomes|Genetics*. 5:1273-1282.

243

## 244 **Supplementary Tables and Figures**

245 **Table S1.** Strain information.

246 **Table S2.** Primer pairs used in this study.

247 **Table S3.** Summary statistics for all *Saccharomyces* and each species using COX2.

248 **Table S4.** Distribution of AT tandem repeats.

249







263 **Figure S2. COX2 Neighbor-Net phylogenetic network for each COX2 segment.**

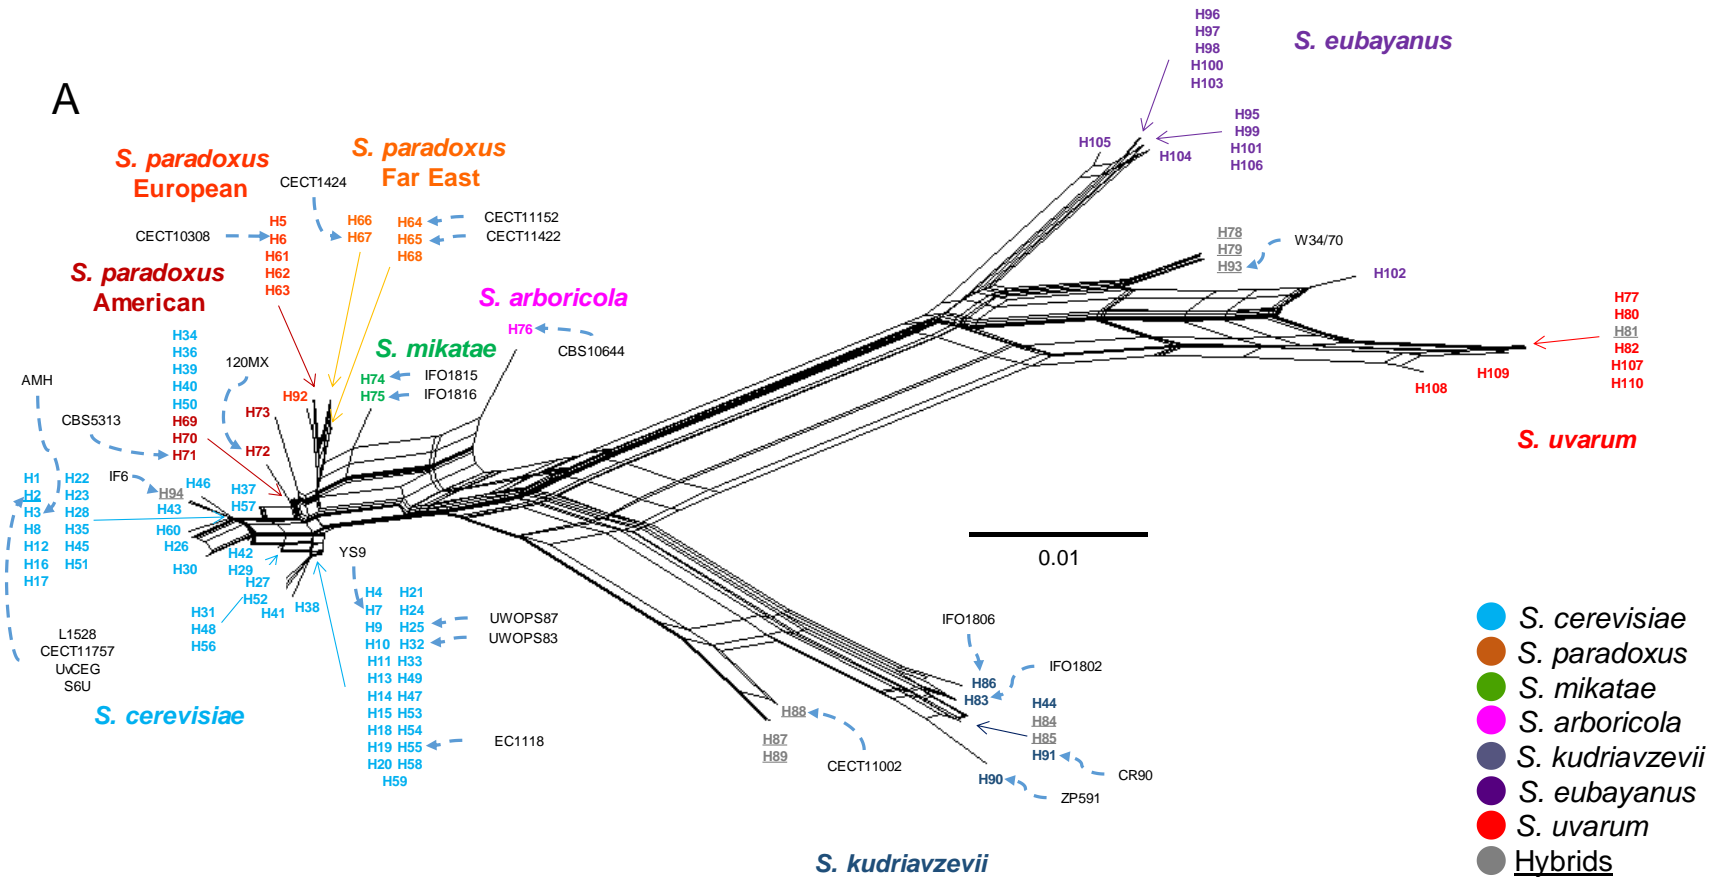

264



270 **Figure S3. ORF1 Neighbor-Joining phylogenetic tree.**

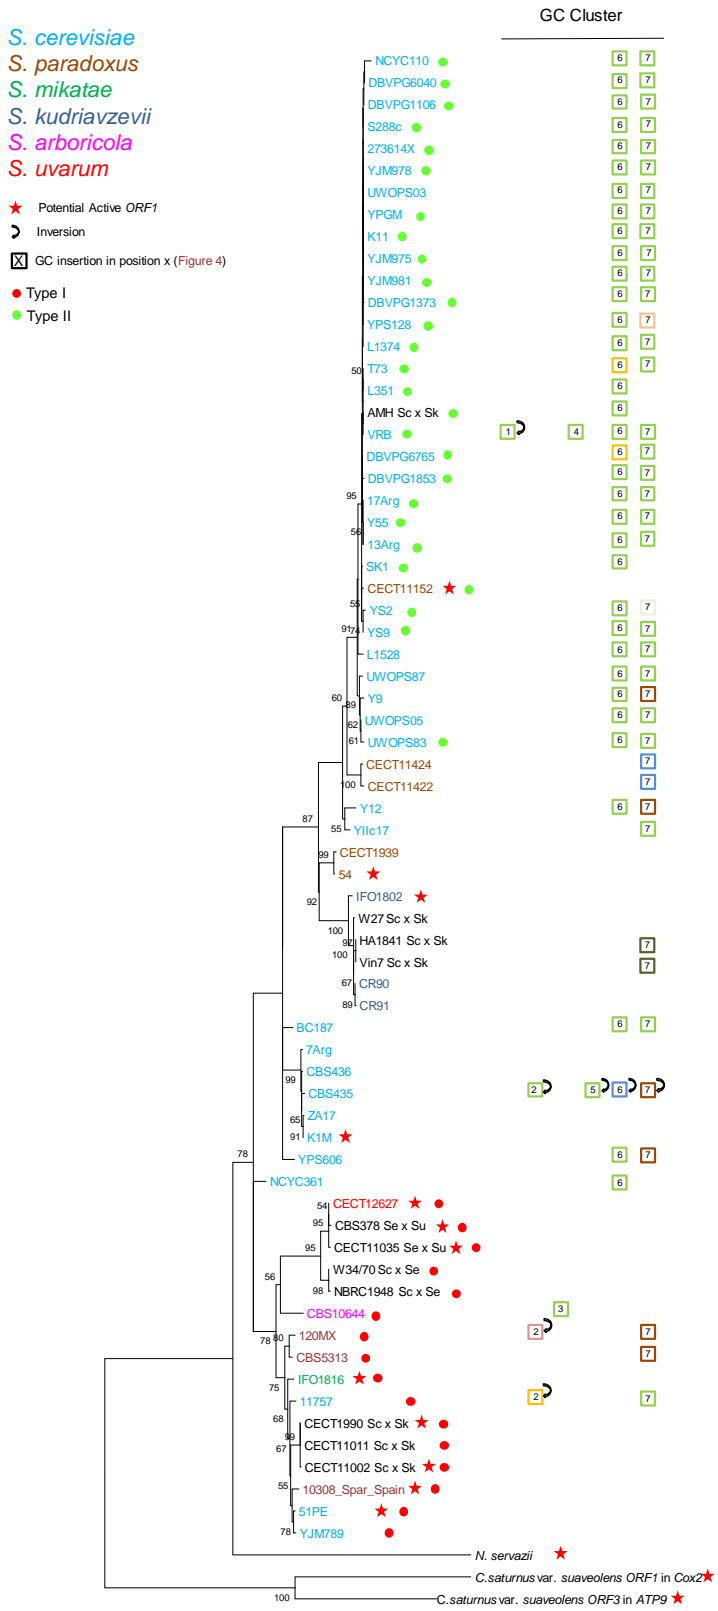

271

0.02



272 A NJ phylogenetic tree was reconstructed for the *ORF1* sequence alignment. Strains  
273 were colored according to the species designation. Bootstrap values above 50 are given  
274 for each branch. A red star represents a potential active *ORF1* based on the absence of  
275 GC clusters, which could disrupt the coding sequence, and premature stop codons. Type  
276 I and Type II *ORF1* sequences, detected as non-recombinant (represented by dots), were  
277 colored in red and green, respectively. GC clusters in the *ORF1* sequence were  
278 represented by squares and the number represents the position in the *ORF1* alignment  
279 (see Figure 6). An arrow indicates that a particular GC cluster was inverted to infer the  
280 GC cluster family. Square colors represent GC cluster similarity according to Figure S11,  
281 and the NJ trees from Figure S12.

282

283 **Figure S4. *ORF1* aminoacid polymorphic sites.**

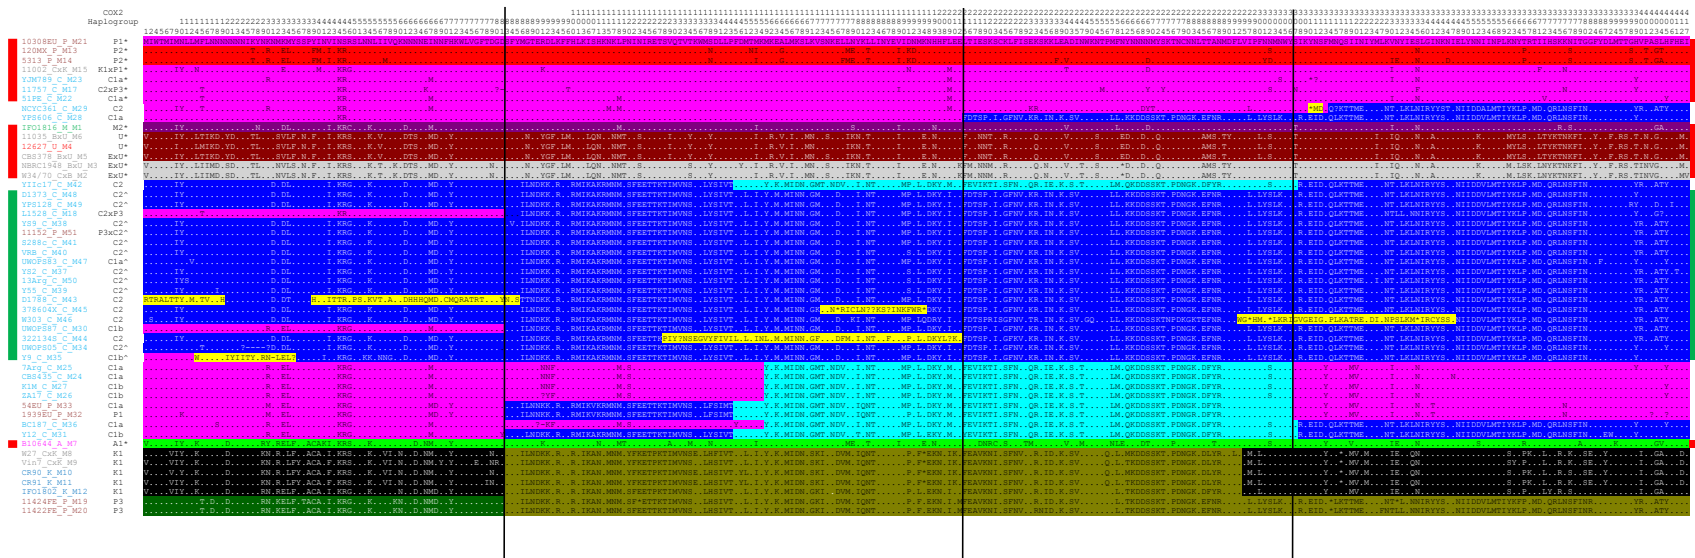

■ Type I  
■ Type II

284  
285 Variable *ORF1* aminoacid positions among haplotypes. Haplotype number are colored according to the species designation,  
286 as in Figure 2. Alignment aminoacid positions for each polymorphic site are also shown. The *COX2* Haplogroup designation  
287 is shown. Sequences were colored according to their similarity as inferred from Figure S5. Symbols \* and ^ represent type  
288 I and type II *ORF1* sequences, respectively. Regions colored in yellow are sequences from unknown source. Lines indicate  
289 the sites corresponding to each alignment partition to reconstruct the *ORF1* phylogenetic networks by segments (Figure  
290 S5).

291 **Figure S5. ORF1 NN phylogenetic networks by segments.**

A

COX2 3'end-246\*

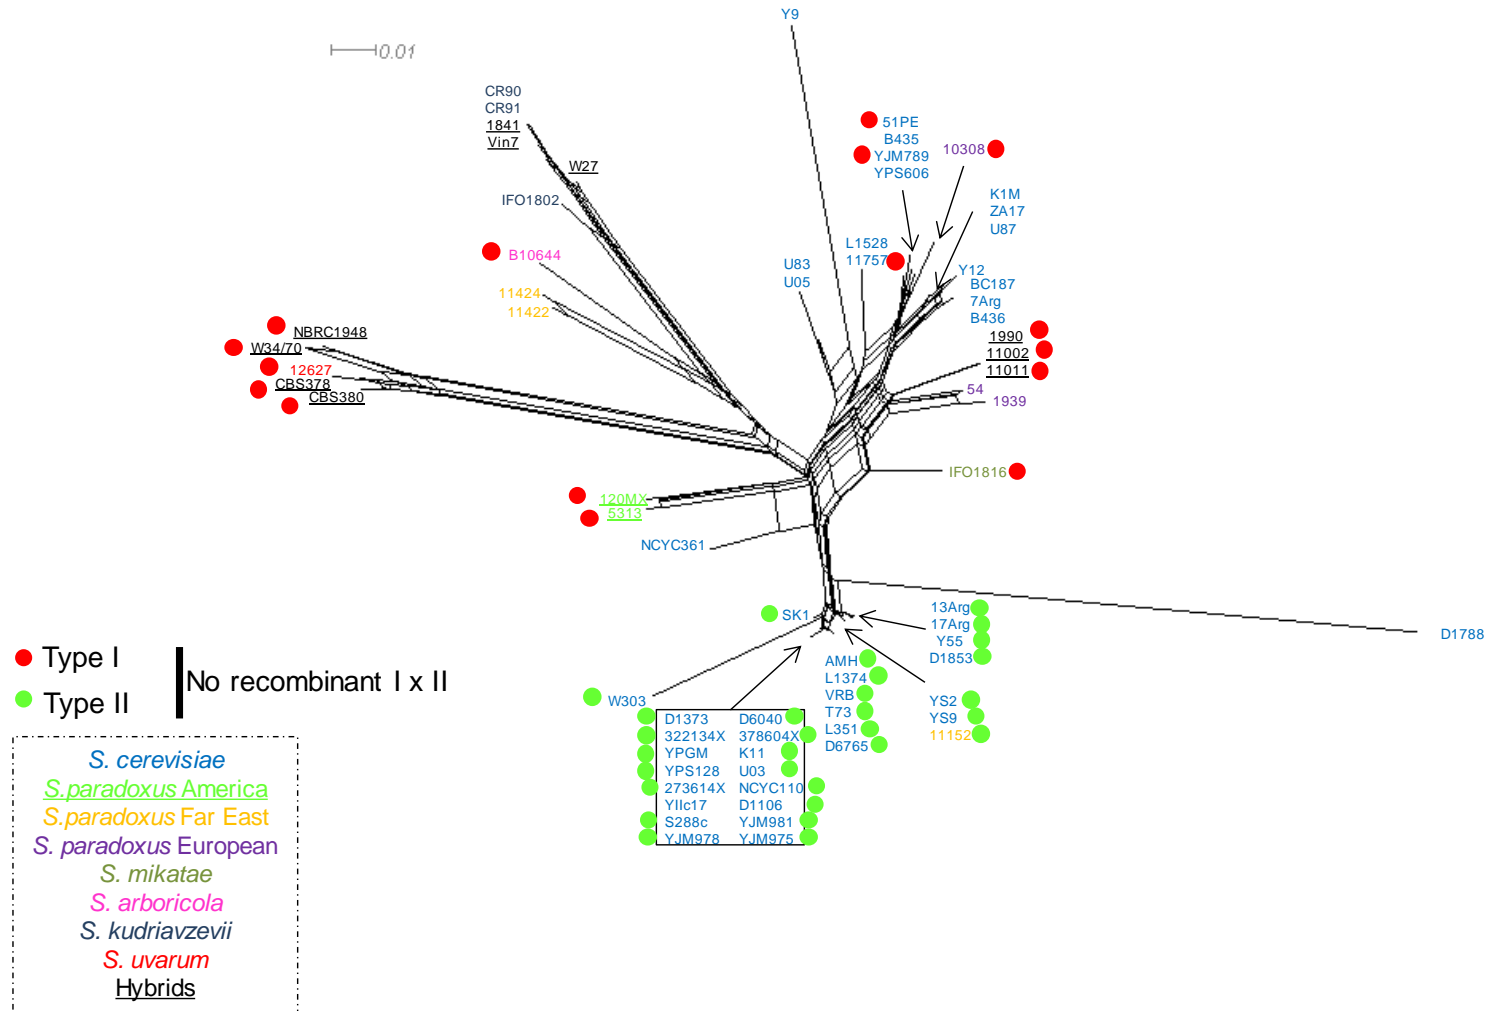

292

293

B

247-644

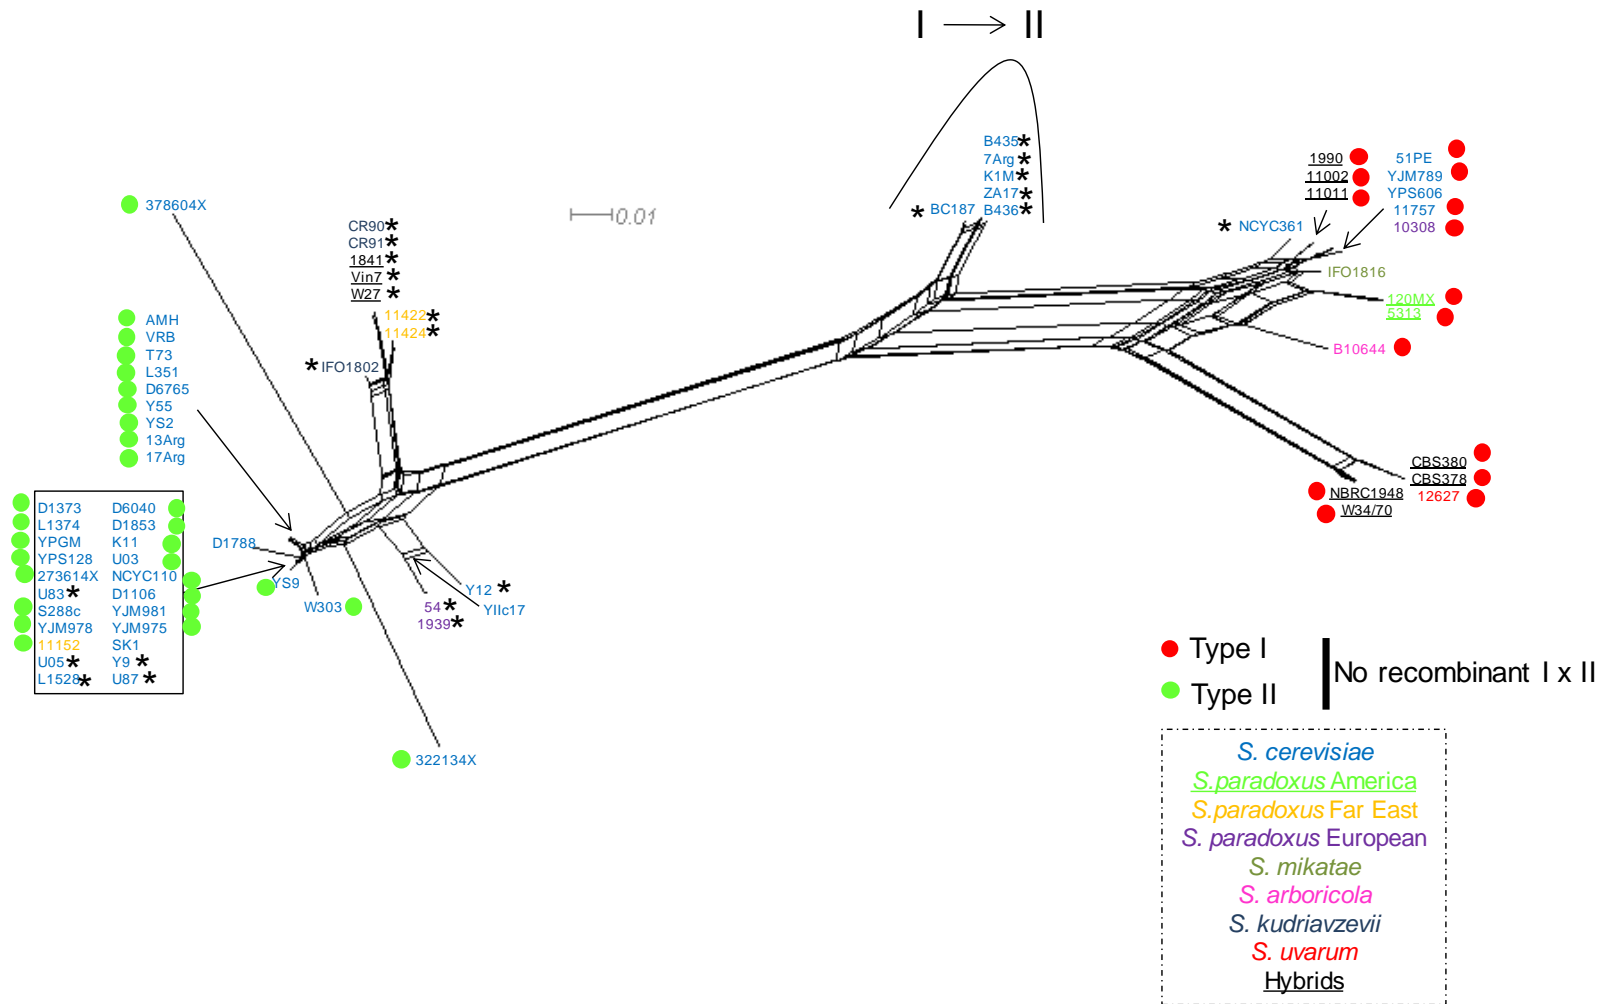

C

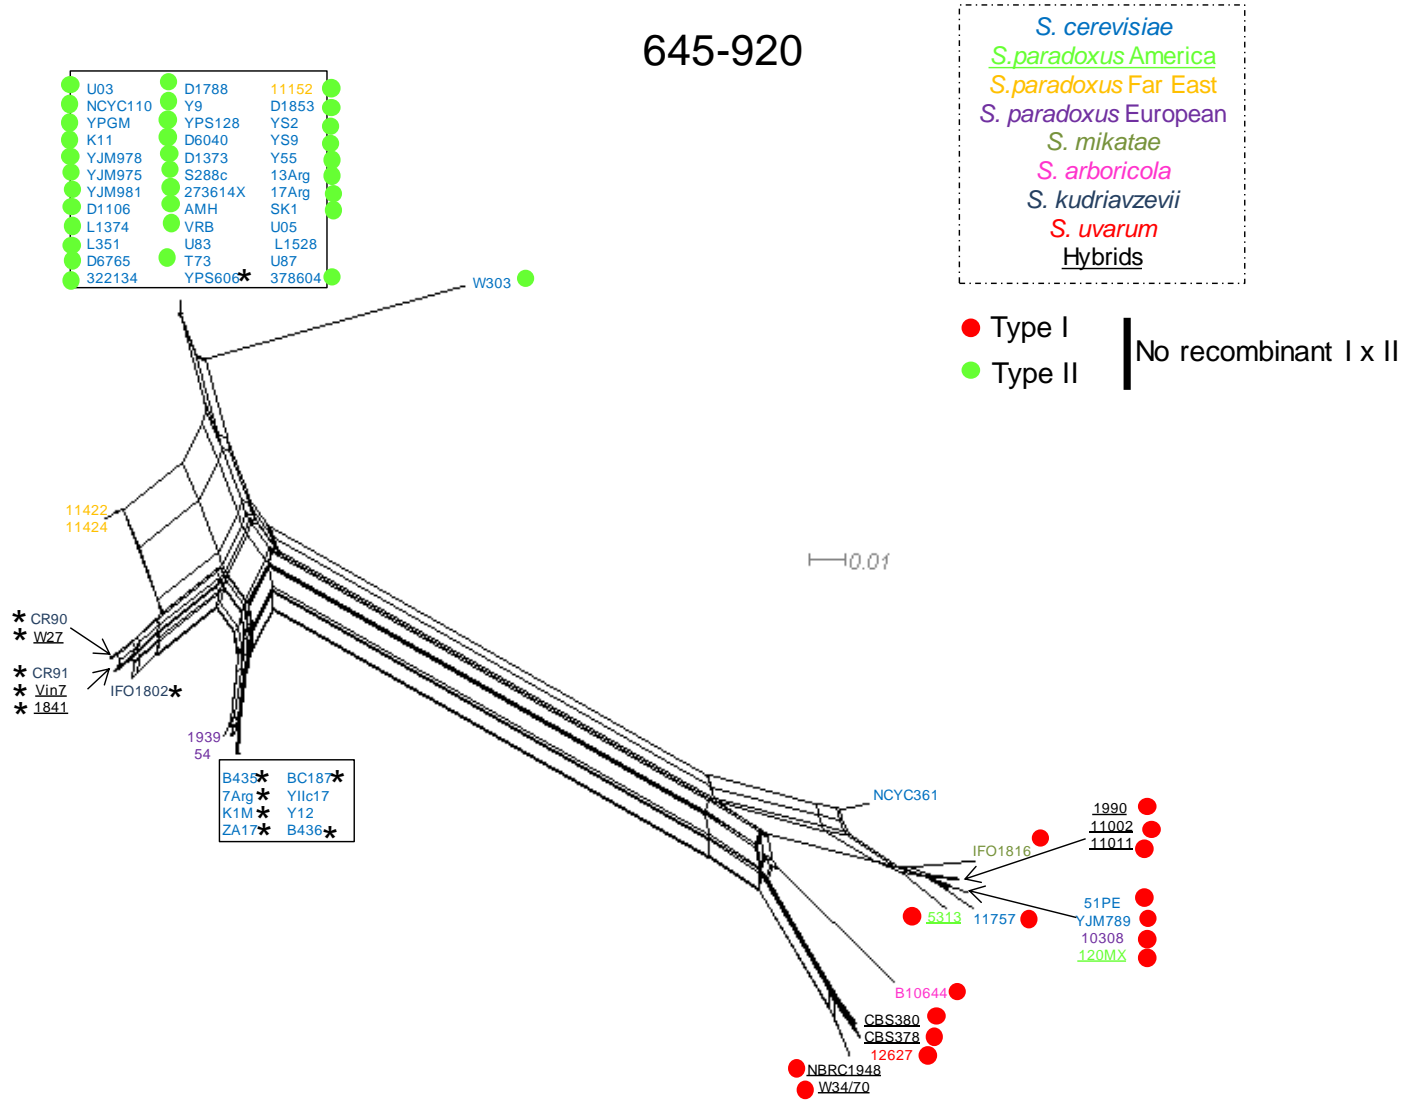

295

296

297

D

921-1251

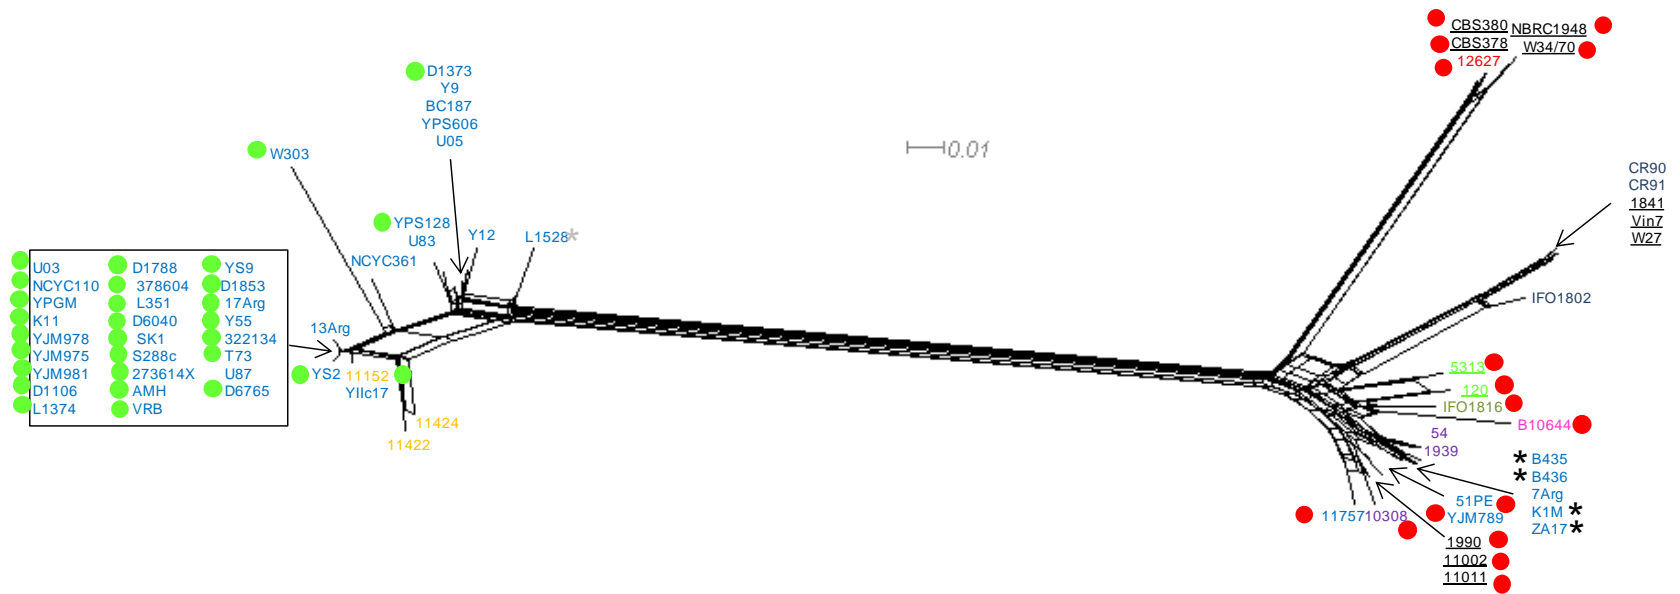

● Type I  
 ● Type II

No recombinant I x II

- S. cerevisiae*
- S. paradoxus* America
- S. paradoxus* Far East
- S. paradoxus* European
- S. mikatae*
- S. arboricola*
- S. kudriavzevii*
- S. uvarum*
- Hybrids

299 NN phylogenetic networks. for each *ORF1* alignment partitions, inferred by *GARD* and *RDP*, are shown in A), B), C) and D).  
300 A) shows the NN phylogenetic network corresponding to the region from *COX2* 3' end (Figure S1) to the position 246 of the  
301 *ORF1* alignment. Nucleotide positions from *ORF1* alignment are shown in figures B-D. Scale bar are given in nucleotide  
302 substitution per site. Type I and Type II *ORF1* sequences, detected as non-recombinant, are represented by red and green  
303 circles, respectively. Sequences are colored to each species designation. In figure B) some *S. cerevisiae* sequences are  
304 grouped in a I -> II group, indicating that the region used for inferring that NN phylonetwork contains a recombination point  
305 for those particular strains driving to the ambiguous position. Asterisks highlight sequences which clustering changed from  
306 one *ORF1* type to another due to its recombinant character.

307 **Figure S6. COX3 NJ phylogenetic tree.**

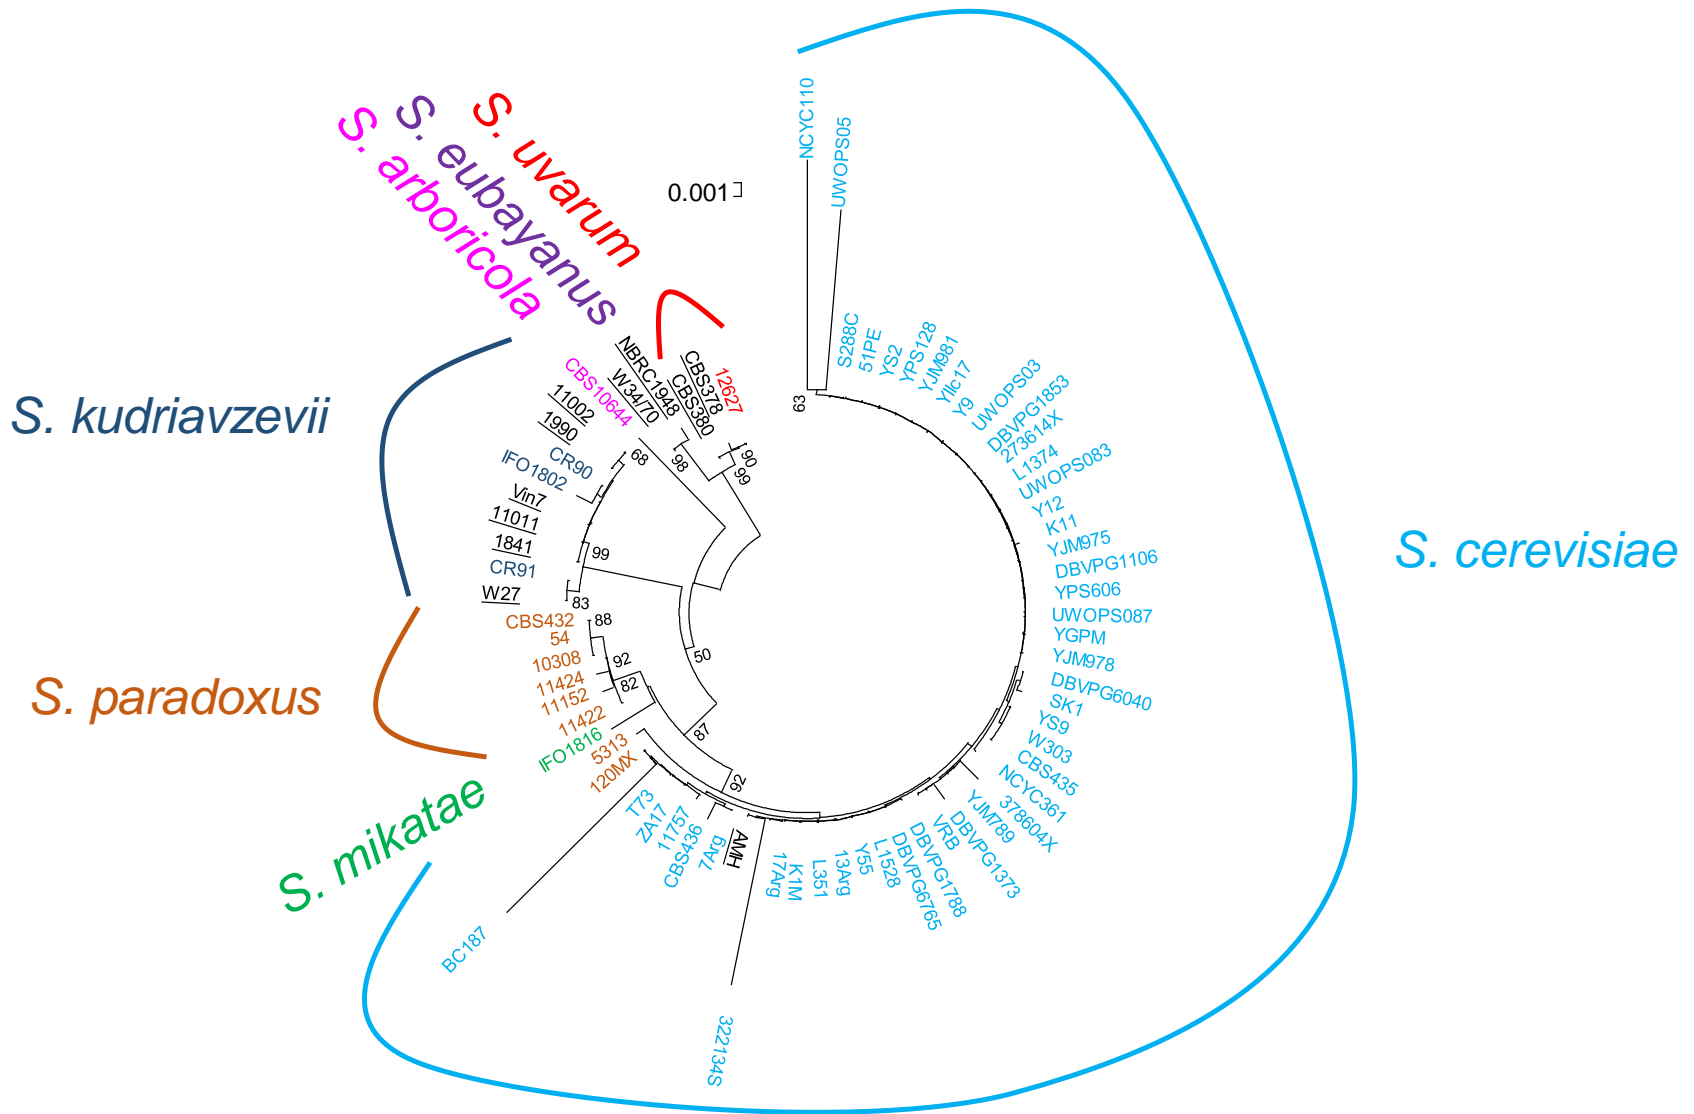

308



309 A *COX3* Neighbor-Joining phylogenetic tree is shown. Strains are colored according to the species designation. Bootstrap  
310 values above 50 are given for each branch. Scale is given in nucleotide substitution per site.

311 **Figure S7. *S. cerevisiae* COX2 MJ networks.**

**A**

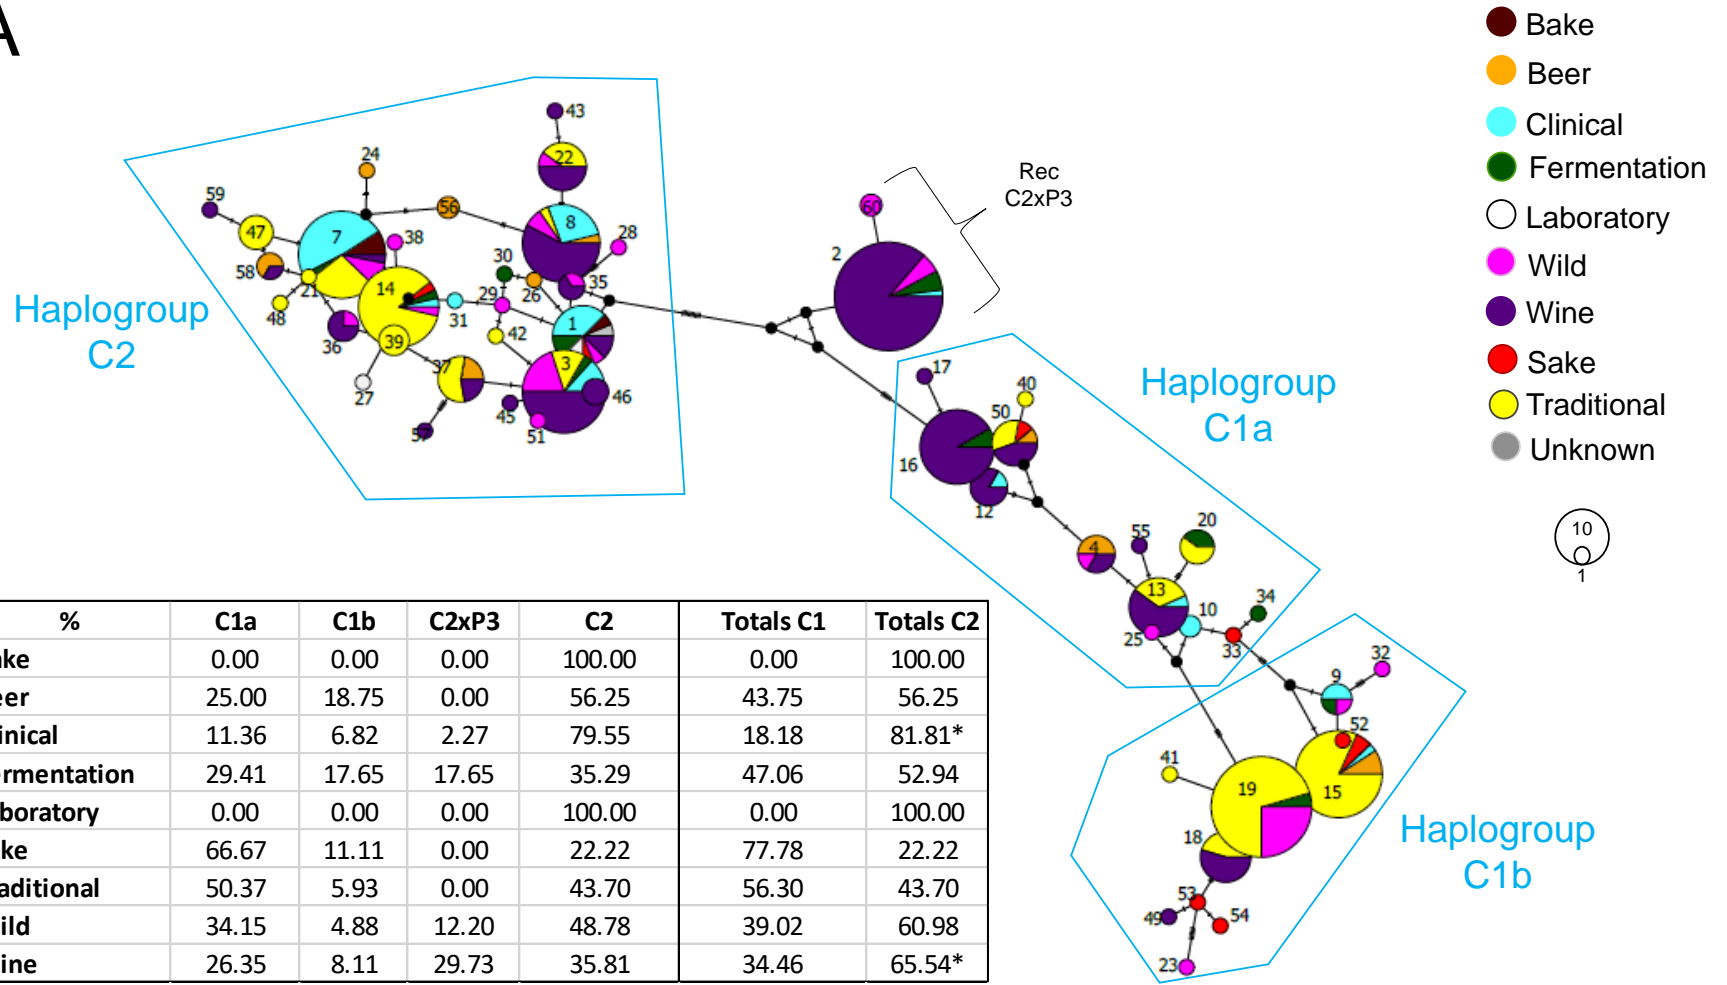

312

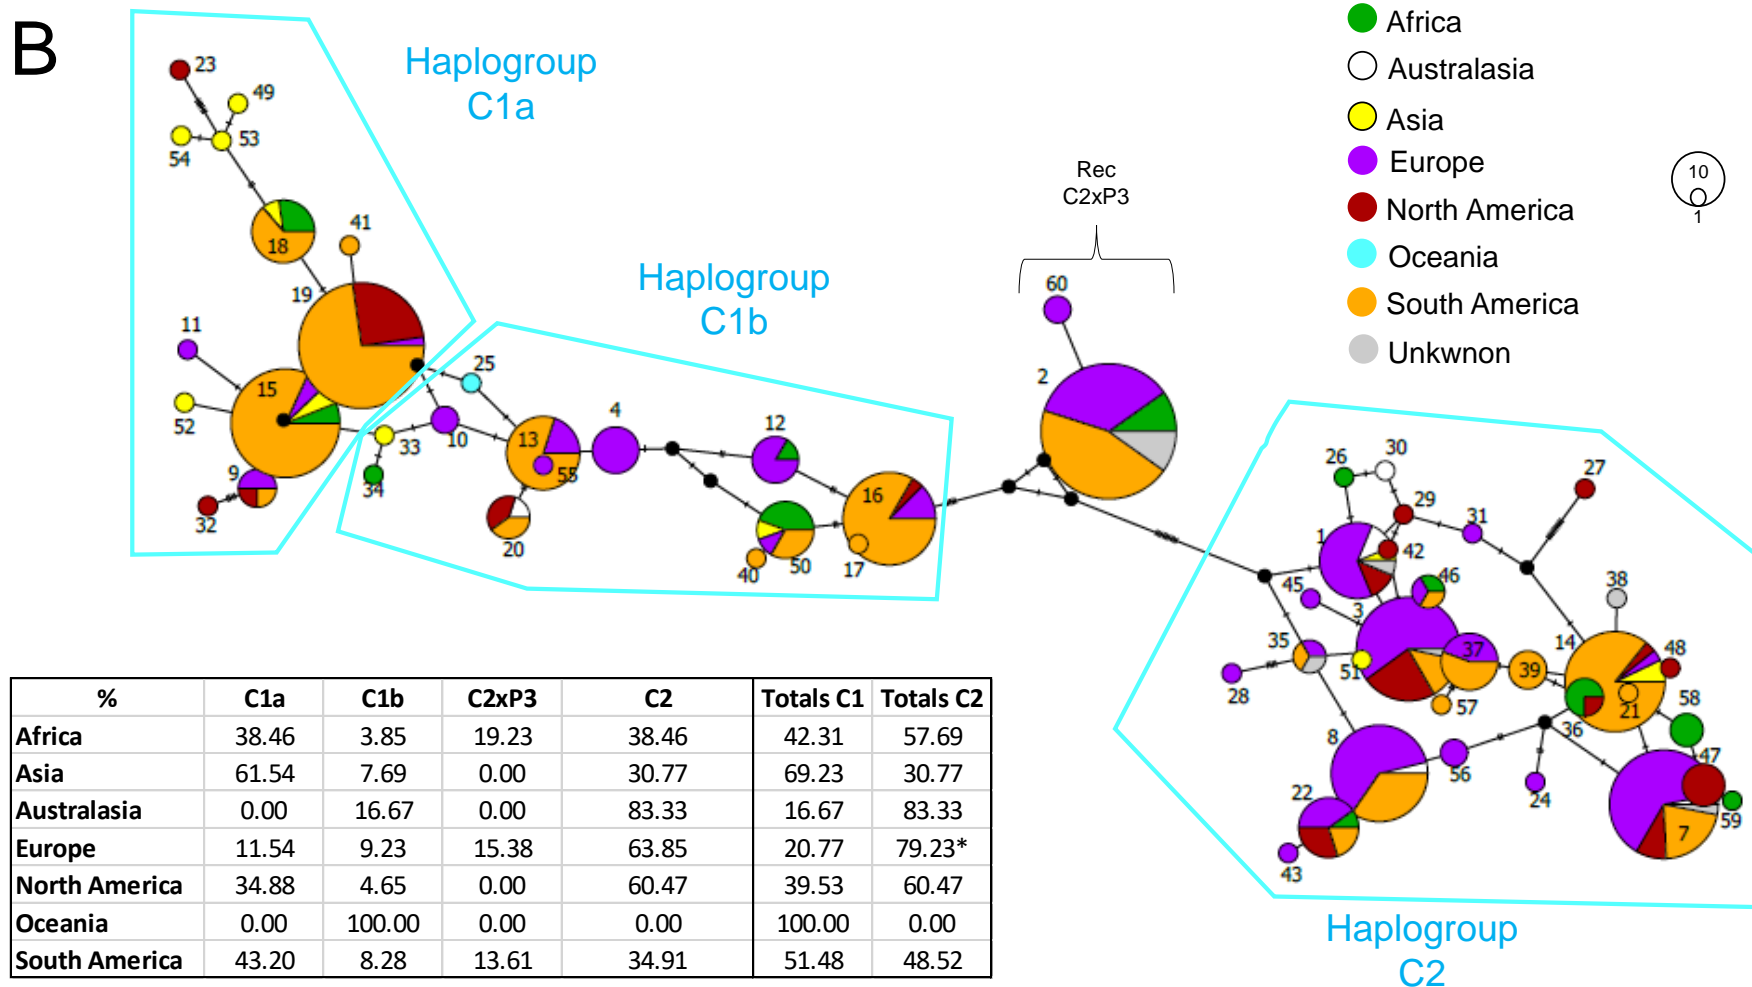

313

314 *S. cerevisiae* COX2 MJ networks were represented in A) and B) where haplotype pie charts were colored according to the  
 315 isolation source and continent of isolation, respectively. Circle sizes represent the number of sequences in a haplotype and  
 316 is scaled according to the legend. Number of mutations from one haplotype to another are indicated by lines in the edges

317 connecting the haplotypes. A table showing the strain percentage distribution in each haplogroup or recombinant group by  
318 isolation source or continent is also displayed in A) and B), respectively.



322 A starting model of potential introgressions in *Saccharomyces* is described. Black, light blue, orange, green, dark blue, pink,  
323 red and purple yeasts represent the yeast ancestors, *S. cerevisiae*, *S. paradoxus*, *S. mikatae*, *S. kudriavzevii*, *S. arboricola*,  
324 *S. uvarum* and *S. eubayanus* yeasts, respectively. Small circles inside yeasts represent the mtDNA, which is colored  
325 according to the species designation. A *S. paradoxus* yeast with a blue small circle indicates a potential inheritance of  
326 mtDNA from *S. cerevisiae*. Red, green or red/green boxes represent type I, type II or recombinant *ORF1* sequences,  
327 respectively. A question tag indicates dubious scenario, unknown *ORF1* or unknown mtDNA sequence due to the absence  
328 of *COX3* sequence to support the mtDNA inheritance.

329

330 Figure S9. Weblogo representation of LAGLIDADG and NUMOD domains.

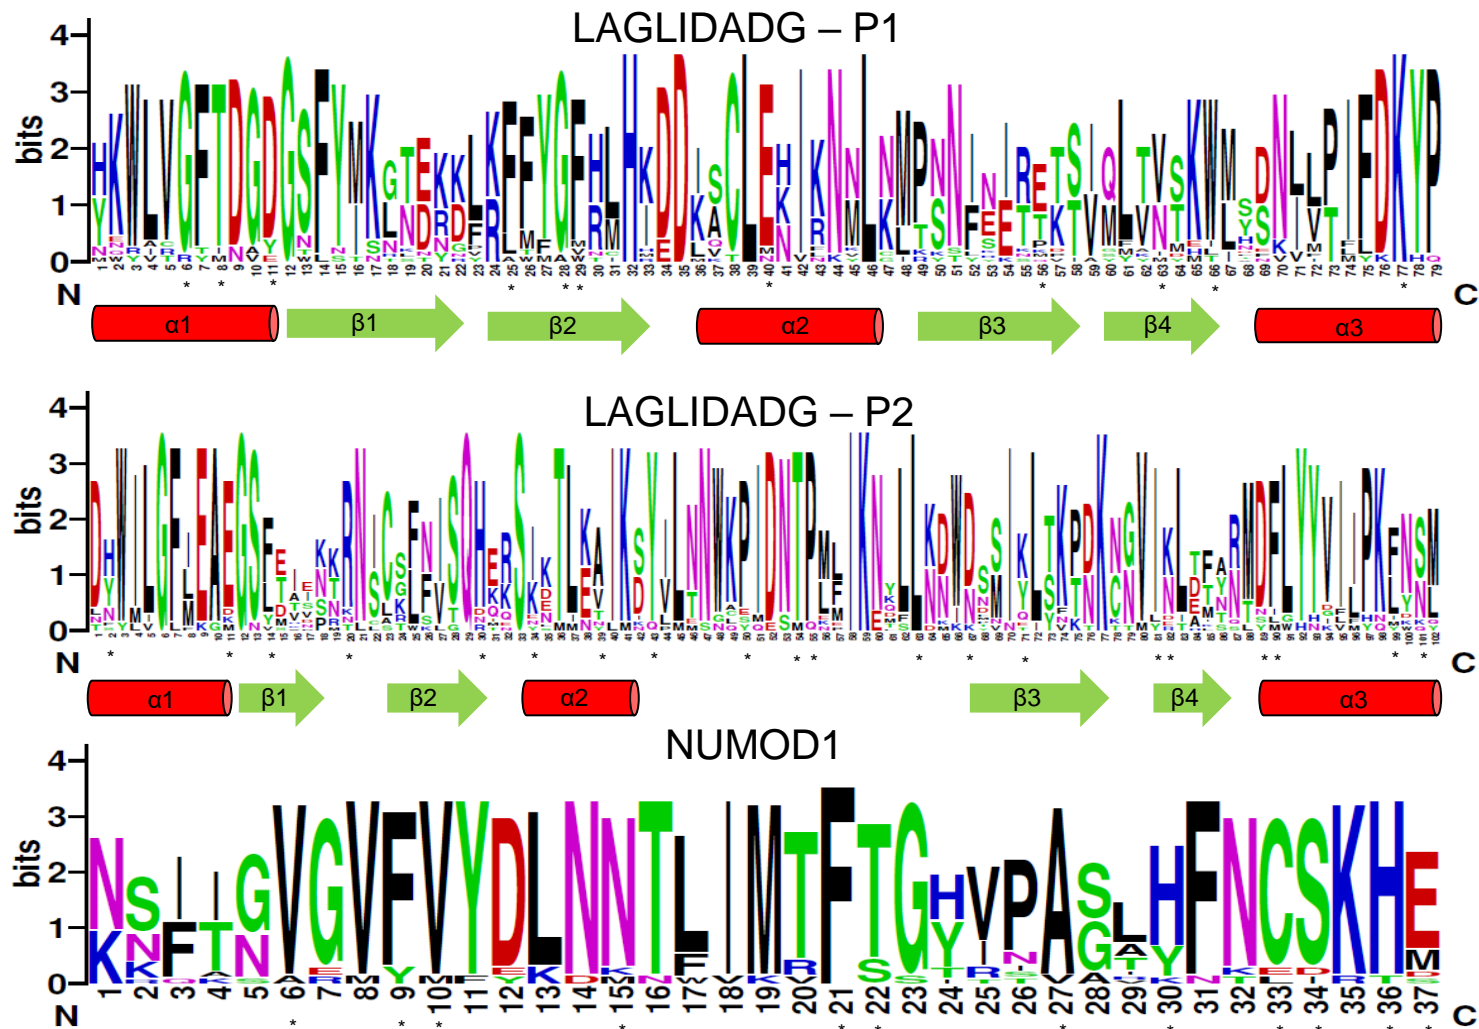

331  
 332 Weblogo (<http://weblogo.berkeley.edu/>) of the three homing endonuclease domains for *Saccharomyces ORF1* genes plus  
 333 *SasefMp08* from *Kazchastania servazii*, and *ORF1* and *ORF3* from *Cyberlindnera (Williopsis) saturnus* var. *suaveolens* are

334 represented. Cylinders and arrows represent  $\alpha$ -helix and  $\beta$ -sheet, as previously described (Dalgaard *et al.* 1997). Asterisk  
335 symbol indicates the codons for those aminoacids under purifying selection detected by DataMonkey.

336



337 **Figure S10. COX2 and ORF1 aminoacid alignment (Supplementary File Figure S10).**

338 The complete *COX2* and *ORF1* aminoacid alignments are shown. Protein secondary structure and domains are indicated  
339 for *ORF1*. Jalview also display the alignment quality (based on BLOSUM 62), physicochemical conservation calculated  
340 according to Livingstone and Barton (Livingstone and Barton GJ 1993), and consensus sequence.

341





349 **Figure S12. GC cluster 6 and 7 Neighbor-Joining phylogenetic trees.**

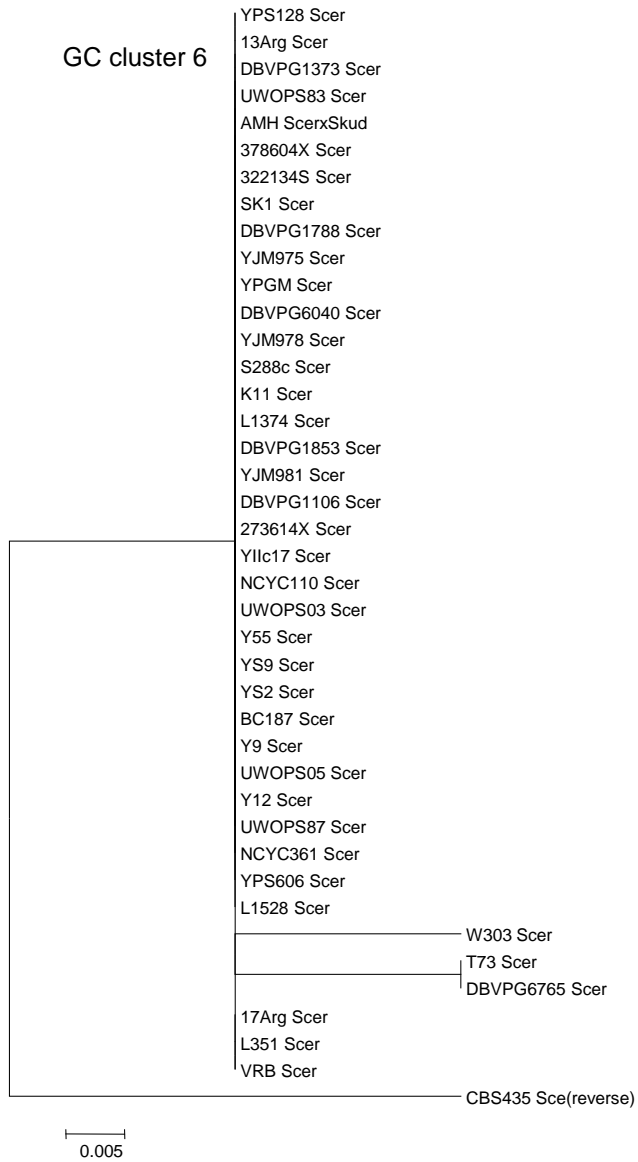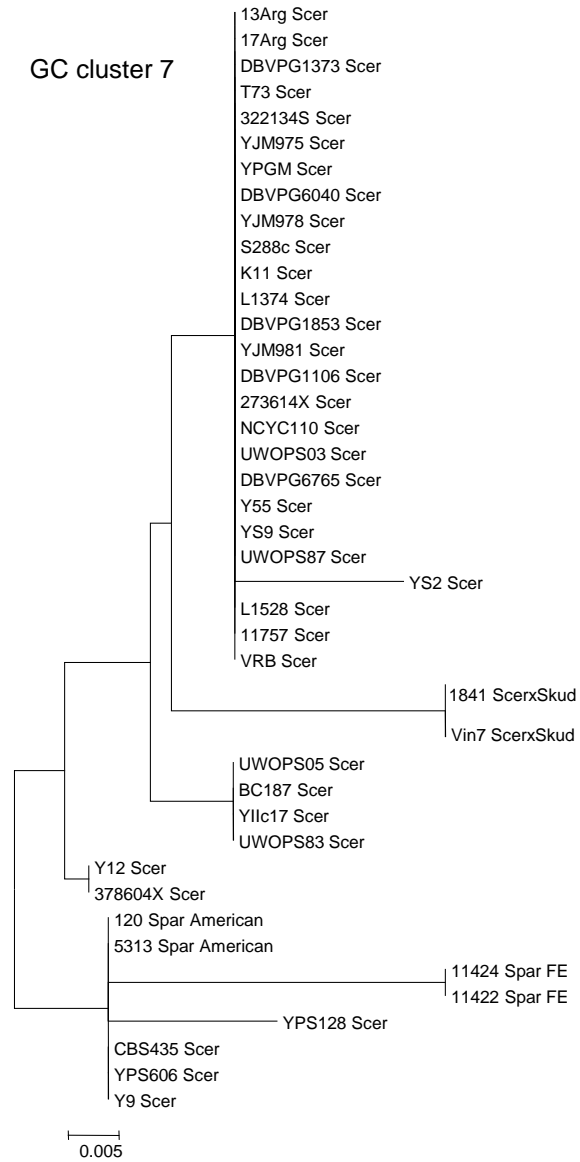

351 To classify the GC cluster according to sequence similarity we reconstructed the NJ phylogenetic tree of GC cluster 6 and  
352 7. This classification is shown by numbers in Figure S3. Scale bars represent number of substitutions per site.
